# Supplementary material for: Transverse jointing in foreland fold-and-thrust belts: a remote sensing analysis in the eastern Pyrenees
Source: Copernicus journal article supplement (doi:10.5194/se-11-1643-2020), 2020-09-01
Supplement: Supplementary file [file se-11-1643-2020-supplement-title-page.pdf › se-11-1643-2020-supplement-title-page.pdf]

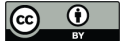

*Supplement of*

## **Transverse jointing in foreland fold-and-thrust belts: a remote sensing analysis in the eastern Pyrenees**

**Stefano Tavani et al.**

*Correspondence to:* Stefano Tavani ([stefano.tavani@unina.it](mailto:stefano.tavani@unina.it))

- [se-11-1643-2020-supplement-title-page.pdf](#)
- [Joint&bedding data.csv](#)
- [Tavani et al2020.cpg](#)
- [Tavani et al2020.dbf](#)
- [Tavani et al2020.prj](#)
- [Tavani et al2020.qpj](#)
- [Tavani et al2020.shp](#)
- [Tavani et al2020.shx](#)

The copyright of individual parts of the supplement might differ from the CC BY 4.0 License.
